# Supplementary material for: Bridging interactions of proteins with silica nanoparticles: The influence of pH, ionic strength and protein concentration
Source: Royal Society of Chemistry journal article supplement (doi:10.1039/c3sm52401a), 2013-11-15
Supplement: c3sm52401a.pdf [file c3sm52401a.pdf]

## *Supporting Information*

### **Bridging interaction of protein with silica nanoparticles: Influence of pH, ionic strength and protein concentration**

Bhuvnesh Bharti,<sup>\*a,‡</sup> Jens Meissner,<sup>a</sup> Sabine H. L. Klapp<sup>b</sup> and Gerhard H. Findenegg<sup>\*a</sup>

<sup>a</sup> *Institut für Chemie, Stranski Laboratorium, TC 7, Technische Universität Berlin, Strasse des 17. Juni 124, D-10623 Berlin, Germany*

<sup>b</sup> *Institut für Theoretische Physik, PN 7-1, Technische Universität Berlin, Hardenbergstrasse 36, D-10623 Berlin, Germany*

\* corresponding author, e-mail: [bhuvneshbharti@gmail.com](mailto:bhuvneshbharti@gmail.com); [findenegg@chem.tu-berlin.de](mailto:findenegg@chem.tu-berlin.de)

‡ present address: *Department of Chemical and Biomolecular Engineering, North Carolina State University, Raleigh, NC 27695, USA*

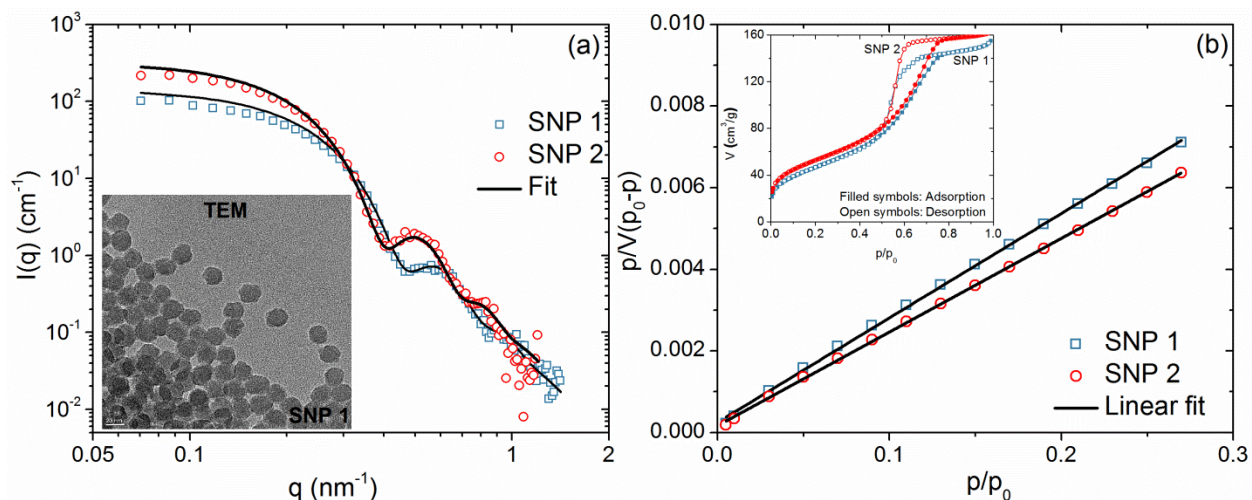

**Figure S1** (a) SAXS profile for the 1-wt% dispersion of silica nanoparticles used in the study. The points represent the measured experimental data set and the black line represents the fit to the data by the form factor of polydisperse spheres. The inset is a TEM image of SNP1 particles confirming the spherical nature of the silica nanoparticles. Scale bar give in the TEM image corresponds to 20 nm real space distance. (b) BET plot of the N<sub>2</sub> adsorption isotherm for SNP1 and SNP2, the inset in the figure shows the full adsorption isotherm for two silica samples.

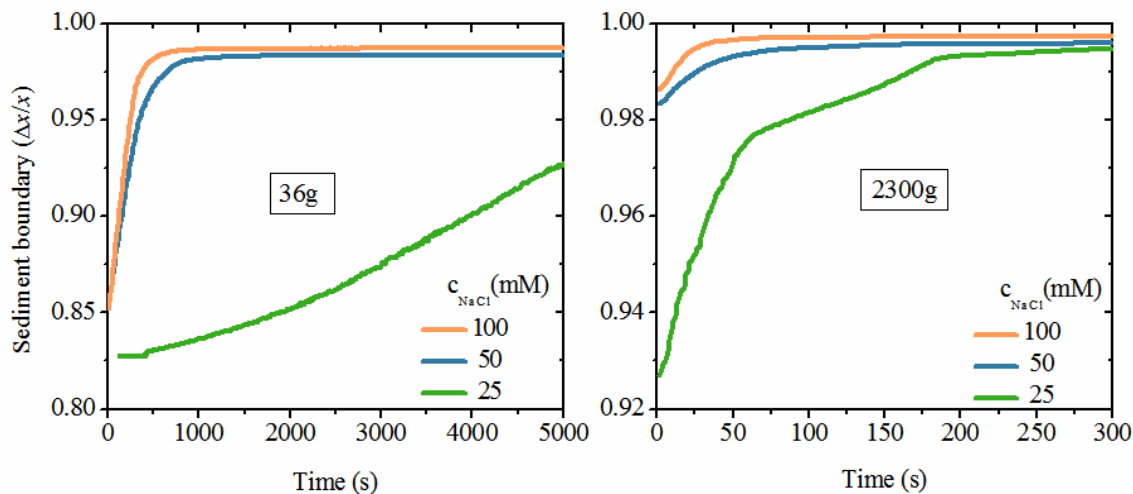

**Figure S2** Sedimentation separation rate of protein/nanoparticle aggregate under low (36g, left) and high (2300g, right) compressive stress. The sedimentation kinetics of silica/lysozyme dispersion at 25mM NaCl was observed to be significantly slower than at 50 and 100mM NaCl concentrations.

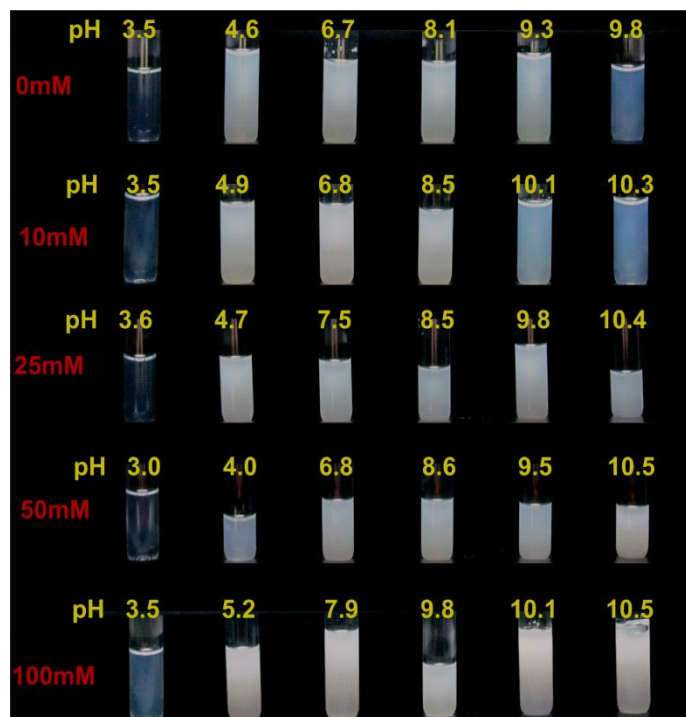

**Figure S3** Images of the silica/lysozyme dispersions showing the aggregation and redispersion of the silica nanoparticles at different salinities (in red) and pH values (in yellow).
